# Supplementary material for: Analysis ofPolygala tenuifoliaTranscriptome and Description of Secondary Metabolite Biosynthetic Pathways by Illumina Sequencing
Source: Hindawi journal article supplement (doi:10.1155/2015/782635), 2015-01-01
Supplement: f1 [file 782635.f1.pdf]

TABLE S1. Length distribution of raw data

| <b>Raw Reads</b> | <b>Raw Data(bp)</b> | <b>Q20(%)</b> | <b>Q30(%)</b> | <b>GC(%)</b> | <b>Reads Len.(bp)</b> |
|------------------|---------------------|---------------|---------------|--------------|-----------------------|
| 58,881,563       | 11,776,3112,600     | 97.52         | 93.11         | 43.90        | 101                   |

TABLE S2. Length distribution of assembled contigs, transcripts, and unigenes

|             | <b>Total Length (bp)</b> | <b>Sequence No.</b> | <b>Max Length (bp)</b> | <b>Average Length (bp)</b> | <b>N50</b> | <b>&gt;N50 Reads No.</b> |
|-------------|--------------------------|---------------------|------------------------|----------------------------|------------|--------------------------|
| Contigs     | 98,418,921               | 316,703             | 16,007                 | 310.76                     | 522        | 38,638                   |
| Transcripts | 141,535,320              | 145,857             | 16,008                 | 970                        | 1,636      | 27,911                   |
| Unigenes    | 54,594,810               | 39,625              | 16,008                 | 1,378                      | 1,971      | 9,484                    |
